# Supplementary material for: A microporous zinc–organic framework with Lewis basic pyridyl sites for highly selective C2H2/CH4 and C2H2/CO2 gas separation
Source: Royal Society of Chemistry journal article supplement (doi:10.1039/c9ce01481k), 2019-11-25
Supplement: c9ce01481k1.pdf [file c9ce01481k1.pdf]

## Supporting Information

# A microporous zinc–organic framework with Lewis basic pyridyl sites for highly selective C<sub>2</sub>H<sub>2</sub>/CH<sub>4</sub> and C<sub>2</sub>H<sub>2</sub>/CO<sub>2</sub> gas separation

Peng Yan<sup>a,b</sup>, Jucai Yang<sup>a,\*</sup>, Xiangying Hao<sup>b</sup>, Zhisheng Chen<sup>b</sup>, Guanhua Shen<sup>b</sup>, Yanhua Zhao<sup>b</sup>, Deyun Ma<sup>c,\*</sup> and Jiaxin Zhu<sup>d</sup>

<sup>a</sup>School of Chemical Engineering, Inner Mongolia University of Technology and Inner Mongolia Key Laboratory of Theoretical and Computational Chemistry Simulation, Hohhot 010051, P. R. China. E-mail: yangjc@imut.edu.cn.

<sup>b</sup>School of Environmental and Chemical Engineering, Zhaoqing University, Zhaoqing 526061, P. R. China.

<sup>c</sup>School of Food and Pharmaceutical Engineering, Zhaoqing University, Zhaoqing 526061, P. R. China. E-mail: [mady@zqu.edu.cn](mailto:mady@zqu.edu.cn)

<sup>d</sup>Department of Chemistry, Fudan University, Shanghai 200433, P. R. China.

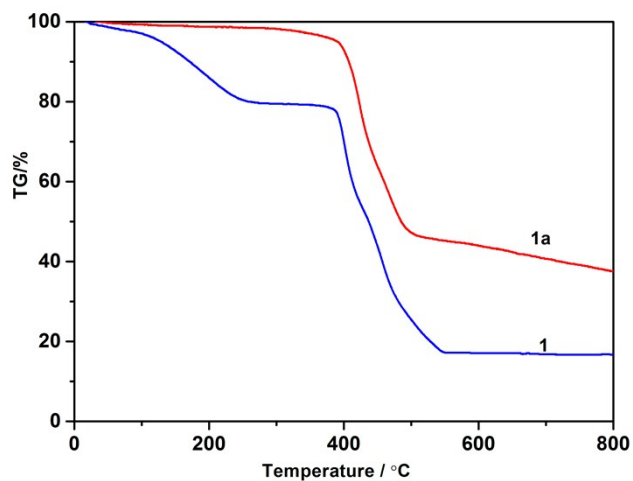

Figure S1. Thermogravimetric curves for **1** and **1a**.

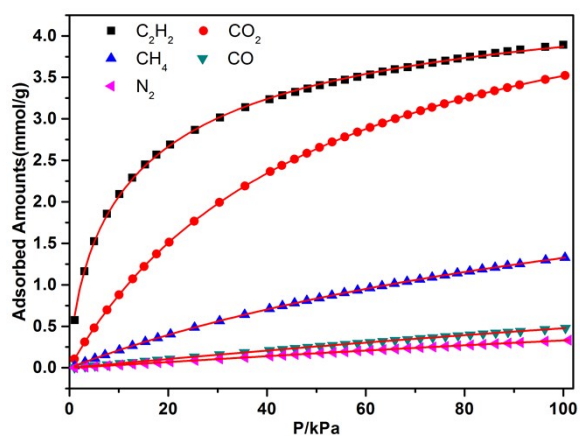

Figure S2.  $C_2H_2$ ,  $CO_2$ ,  $CH_4$ ,  $CO$  and  $N_2$  isotherms of **1a** fitted by LF model at 273 K.

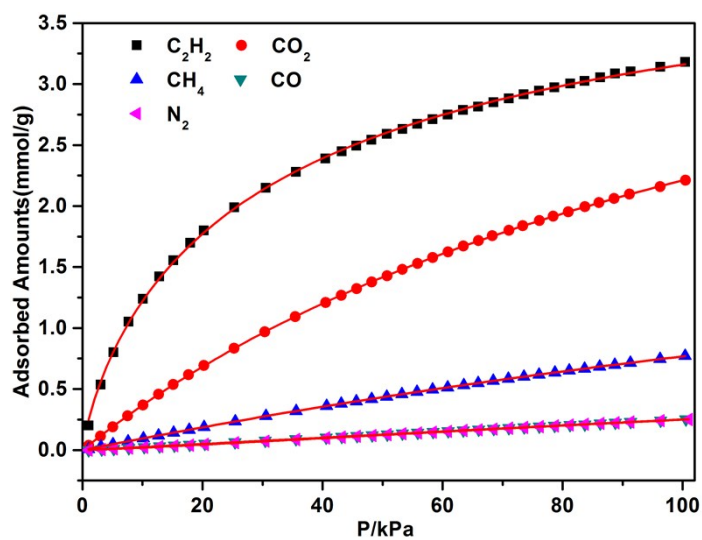

Figure S3.  $C_2H_2$ ,  $CO_2$ ,  $CH_4$ ,  $CO$  and  $N_2$  isotherms of **1a** fitted by LF model at 298 K.

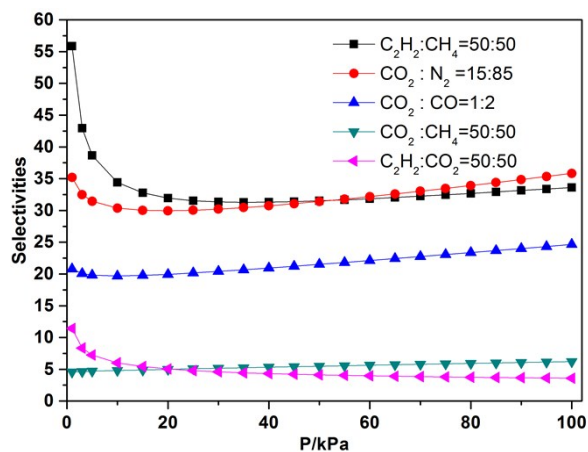

**Fig. S4.** IAST-predicted selectivities for C<sub>2</sub>H<sub>2</sub>/CH<sub>4</sub>(50:50), C<sub>2</sub>H<sub>2</sub>/CO<sub>2</sub>(50:50), CO<sub>2</sub>/N<sub>2</sub> (15:85), CO<sub>2</sub>/CO(1:2) and CO<sub>2</sub>/CH<sub>4</sub> (50:50) mixtures on **1a** at 273 K.

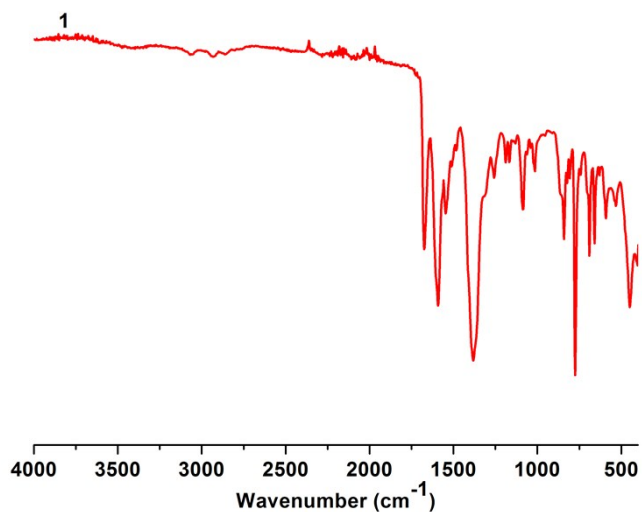

**Figure S5.** IR spectra of **1**.

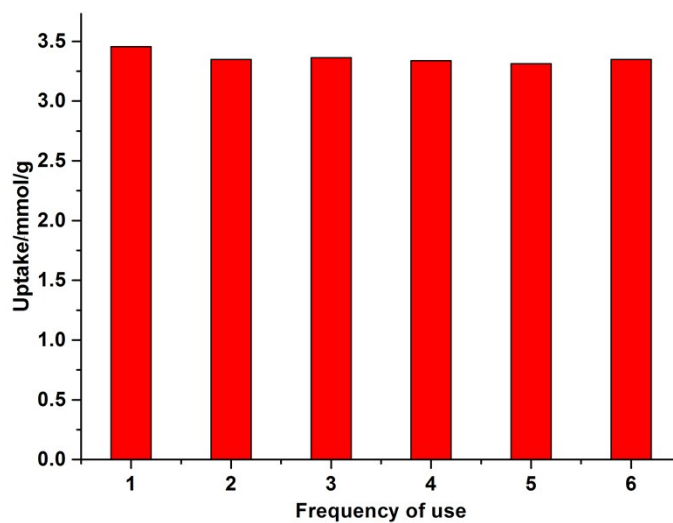

**Figure S6.** The reusability of **1a** for CO<sub>2</sub> adsorption.

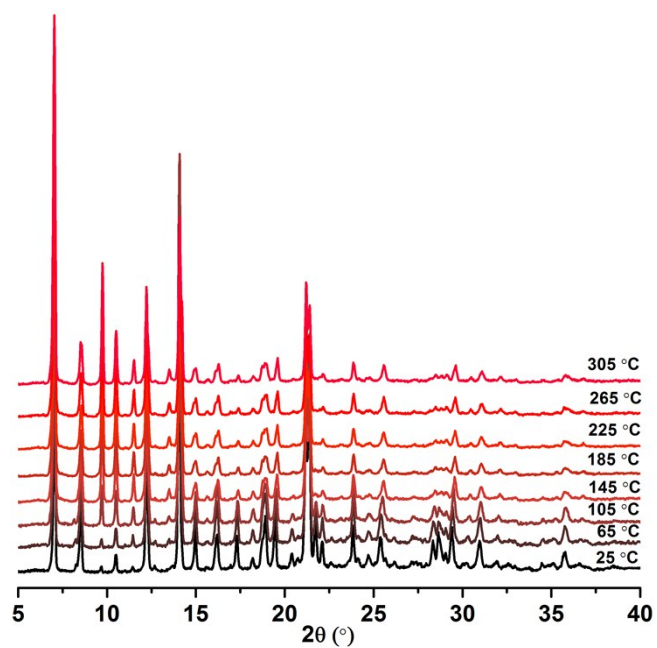

**Figure S7.** Variable-temperature PXRD patterns for **1**.

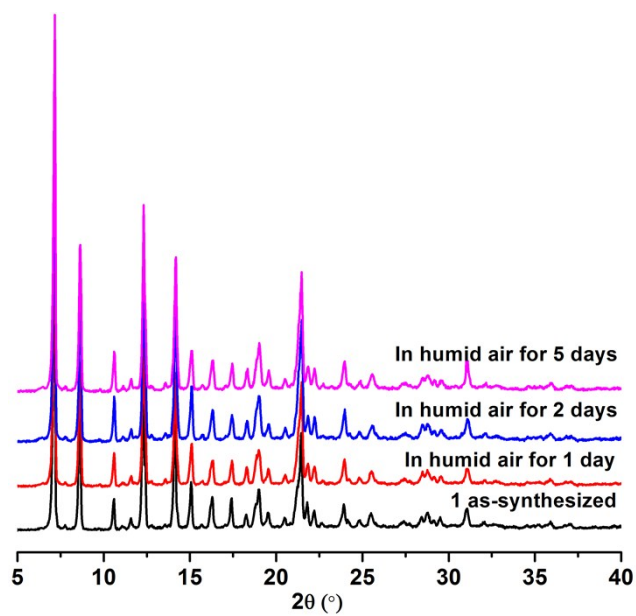

**Figure S8.** PXRD patterns for **1** exposed to humid air for 1, 2, and 5 days.

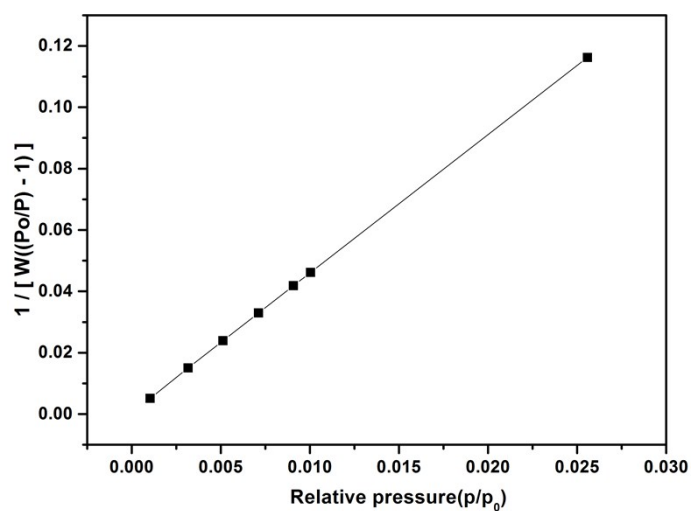

**Figure S9.** The BET surface area plot of **1a**.

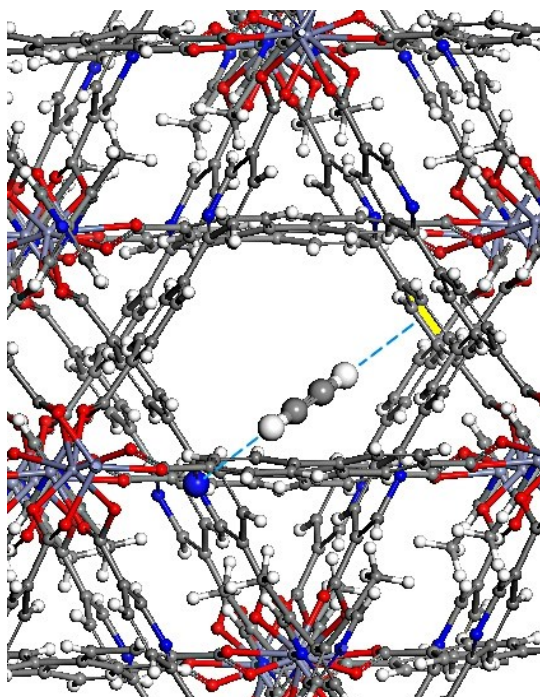

**Figure S10.** The DFT-calculated adsorption configurations of  $C_2H_2$  in the channel. (Zinc, carbon, oxygen, nitrogen, and hydrogen atoms are in slateblue, gray, red, blue, and white, respectively.)

**Table S1** Selected bond lengths (Å) and bond angles (°) for **1**.

| 1                         |          |                              |            |
|---------------------------|----------|------------------------------|------------|
| Zn(1)-O(1)                | 1.939(3) | Zn(1)-N(1)                   | 2.045(3)   |
| Zn(1)-O(6) <sup>ii</sup>  | 1.940(3) | Zn(1)-O(5) <sup>i</sup>      | 1.982(3)   |
| Zn(2)-O(2) <sup>i</sup>   | 2.110(6) | Zn(2)-O(3) <sup>iii</sup>    | 2.058(6)   |
| Zn(2)-O(4) <sup>iii</sup> | 2.134(6) | N(1)-Zn(1)-O(5) <sup>i</sup> | 104.37(13) |

|                                              |            |                                               |            |
|----------------------------------------------|------------|-----------------------------------------------|------------|
| O(6) <sup>ii</sup> -Zn(1)-O(5) <sup>i</sup>  | 123.65(15) | O(1)-Zn(1)-N(1)                               | 99.21(13)  |
| O(1)-Zn(1)-O(5) <sup>i</sup>                 | 111.99(15) | O(1)-Zn(1)-O(6) <sup>ii</sup>                 | 115.15(12) |
| O(6) <sup>ii</sup> -Zn(1)-N(1)               | 96.87(13)  | O(3) <sup>iii</sup> -Zn(2)-O(2) <sup>ii</sup> | 151.0(3)   |
| O(2) <sup>ii</sup> -Zn(2)-O(2) <sup>i</sup>  | 112.8(4)   | O(2) <sup>i</sup> -Zn(2)-O(4) <sup>iii</sup>  | 91.3(2)    |
| O(3) <sup>iii</sup> -Zn(2)-O(2) <sup>i</sup> | 93.3(3)    | O(3) <sup>iii</sup> -Zn(2)-O(3)               | 65.2(4)    |
| O(3)-Zn(2)-O(4)                              | 86.2(3)    | O(4) <sup>iii</sup> -Zn(2)-O(4)               | 150.9(4)   |

Symmetry codes: i = x, 1-y, 1.5+z; ii = 0.5-x, 0.5+y, z; iii = 1.5-x, 0.5-y, 1.5+z.

**Table S2** Fitting parameters of the Langmuir-Freundlich modle at 273 K.

| Parameters     | <b>1</b>                      |                 |                 |        |                |
|----------------|-------------------------------|-----------------|-----------------|--------|----------------|
|                | C <sub>2</sub> H <sub>2</sub> | CO <sub>2</sub> | CH <sub>4</sub> | CO     | N <sub>2</sub> |
| q <sub>m</sub> | 4.9159                        | 5.2880          | 3.2623          | 2.4980 | 1.6150         |
| k              | 0.1423                        | 0.0199          | 0.0071          | 0.0019 | 0.0017         |
| n              | 0.7072                        | 1.0001          | 0.9929          | 1.0419 | 1.0868         |
| R <sup>2</sup> | 0.9995                        | 0.9999          | 1               | 0.9999 | 0.9999         |

**Table S3** Fitting parameters of the Langmuir-Freundlich modle at 298 K.

| Parameters     | <b>1</b>                      |                 |                 |        |                |
|----------------|-------------------------------|-----------------|-----------------|--------|----------------|
|                | C <sub>2</sub> H <sub>2</sub> | CO <sub>2</sub> | CH <sub>4</sub> | CO     | N <sub>2</sub> |
| q <sub>m</sub> | 4.4688                        | 5.0619          | 3.0861          | 2.0099 | 1.2232         |
| k              | 0.0585                        | 0.0079          | 0.0030          | 0.0010 | 0.0011         |
| n              | 0.8074                        | 0.9967          | 1.0197          | 1.0792 | 1.1840         |
| R <sup>2</sup> | 0.9996                        | 0.9999          | 0.9999          | 0.9999 | 0.9999         |

### The method for calculation of gas selectivity:

The ideal adsorbed solution theory (IAST) developed by Myers and Praunitz [1]. From the IAST, the spreading pressure  $\pi$  is expressed as follows:

$$\pi_i^0(p_i^0) = \frac{RT}{A} \int_0^{p_i^0} \frac{q_i}{p} dp \quad (1)$$

$$\pi_i^* = \frac{\pi_i^0 A}{RT} = \int_0^{p_i^0} \frac{q_i}{p} dp \quad (2)$$

where  $\pi$  and  $\pi^*$  are the spreading pressure and the reduced spreading pressure, separately.  $A$  is the specific surface area of the adsorbent.  $p_i^0$  is the gas pressure of component  $i$  that corresponding to the spreading pressure  $\pi$  of the gas mixture.

At a constant temperature, the spreading pressure of single component is the same:

$$\pi_1^* = \pi_2^* = \dots = \pi_n^* \quad (3)$$

For binary adsorption of component  $i$ , the IAST requires:

$$Py_i = p_i^0 x_i \quad (4)$$

where  $y_i$  and  $x_i$  are the molar fractions of component  $i$  in the gas phase and in the adsorbed phase, respectively.  $P$  is the total gas pressure,  $p_i^0$  is the pressures of component  $i$  at the same spreading pressure as that of the mixture.

The adsorption isotherm of the pure component was fitted with a certain adsorption model to obtain the corresponding parameters. Then use formula (2) to get the specific spreading pressure expression. Finally, the  $x_i$  corresponding to a given total pressure  $P$  and the composition of  $y_i$  in the gas mixture is obtained according to formula (3) and (4).

Thus, adsorption selectivity  $S$  of a binary mixture is defined as:

$$S = \frac{x_1/y_1}{x_2/y_2} \quad (5)$$

The method for calculation of isosteric heat of adsorption:

The relationship between adsorption heat and temperature and pressure can be obtained by integrating the Clausius-Clapeyron equation as follows:

$$\ln p = -\frac{Q_{st}}{RT} + C$$

Using the adsorption isotherm data at different temperatures to draw a graph, the isosteric heat of adsorption can be obtained according to the slope of the straight line.

### **Density-Functional Theory Calculations:**

To obtain the gas binding energies, we use the DMOL3 to calculate the energy for the system, framework and gas molecule. The static binding energy was then calculated by using:  $EB = (E_{(MOF)} + E_{g(gas)}) - E_{(MOF+gas)}$ .<sup>2,3</sup>

[1] A. Myers, J.M. Prausnitz, Thermodynamics of mixed-gas adsorption, *AIChE. J.*, 1965, **11**, 121-127.

[2] DMol3, v. Accelrys, Inc, San Diego, 2005.

[3] Babarao, R.; Jiang, J. *J. Phys. Chem. C*, 2009, **113**, 18287-18291.
